# Supplementary material
Source: PubMed Central journal article supplement (PMC4178629)
Supplement: AEM.02090-14_zam020145734so1.pdf [file AEM.02090-14_zam020145734so1.pdf]

**Supplement:** Sequences of the IPNV-like isolates

*VP2 sequences (Segment A)*

- Isolate SpSps\_IAusc1538.10  
TGGTCAGAGGCATCAGAAAAGTGGCAGCACCAGTGCTGTCAACGCTCTTCCCAATGGCCGCCCCACTTATAGGT  
GCGGCCGACCAGTTCATCGGTGACCTCACCAAGACCAACTCAGCCGGGGGGCGCTACCTGTCACATGCAGCTGG  
AGGCCGCTACCGTGATGTCATGGACACATGGGCTAGTGGCTCCGAGACAGGAAGCTACTCAAAGCACCTTAAGA  
CCCGGCTTGAGTCCAACAACCTATGAGGAAGTGGAGCTTCCC
- Isolate SpDv\_IAusc518.11  
TAGTCAGAGGGATCCGGAAAGTGC CGCGCCCCAGTACTGTCAACGCTGTTTCCGATGGCAGCACC ACTCATTGGG  
GTGGCAGACCAACTC ATCGGAGATCTCACCAACACCAACGCAGCAGGCCGGAAGGTACCGCTCCATGGCCGCAG  
GAGGACGCCACAAAGACGTGATGGACTCCTGGGCCAGCGGCCGACCCGACGGGAAGTTCTCCCAGGCTCTAAA  
GAACAGACTGGAGTCTGCCAACTACGAGGAAGTCGAGCTTCCT
- Isolate SpDv\_IAusc519.11  
TGGTCAGAGGCATCAGAAAAGTGGCAGCACCAGTGCTGTCAACGCTCTTCCCAATGGCCGCCCCACTTATAGGT  
GCGGCCGACCAGTTCATCGGTGACCTCACCAAGACCAACTCAGCCGGGGGGCGCTACCTGTCACATGCAGCTGG  
AGGCCGCTACCGTGATGTCATGGACACATGGGCTAGTGGCTCCGAGACAGGAAGCTACTCAAAGCACCTTAAGA  
CCCGGCTTGAGTCCAACAACCTATGAGGAAGTGGAGCTTCCC
- Isolate SpDv\_IAusc520.11  
TAGTCAGAGGGATCCGGAAAGTGC CGCGCCCCAGTACTGTCAACGCTGTTTCCGATGGCAGCACC ACTCATTGGG  
GTGGCAGACCAACTC ATCGGAGATCTCACCAACACCAACGCAGCAGGCCGGAAGGTACCGCTCCATGGCCGCAG  
GAGGACGCCACAAAGACGTGATGGACTCCTGGGCCAGCGGCCGACCCGACGGGAAGTTCTCCCAGGCTCTAAA  
GAACAGACTGGAGTCTGCCAACTACGAGGAAGTCGAGCTTCCT
- Isolate SpDb\_IAusc525.11  
TGGTCAGAGGCATCAGAAAAGTGGCAGCACCAGTGCTGTCAACGCTCTTCCCAATGGCCGCCCCACTTATAGGT  
GCGGCCGACCAGTTCATCGGTGACCTCACCAAGACCAACTCAGCCGGGGGGCGCTACCTGTCACATGCAGCTGG  
AGGCCGCTACCGTGATGTCATGGACACATGGGCTAGTGGCTCCGAGACAGGAAGCTACTCAAAGCACCTTAAGA  
CCCGGCTTGAGTCCAACAACCTATGAGGAAGTGGAGCTTCCC
- Isolate SpPa\_IAusc526.11  
TGGTCAGAGGCATCAGAAAAGTGGCAGCACCAGTGCTGTCAACGCTCTTCCCAATGGCCGCCCCACTTATAGGT  
GCGGCCGACCAGTTCATCGGTGACCTCACCAAGACCAACTCAGCCGGGGGGCGCTACCTGTCACATGCAGCTGG  
AGGCCGCTACCGTGATGTCATGGACACATGGGCTAGTGGCTCCGAGACAGGAAGCTACTCAAAGCACCTTAAGA  
CCCGGCTTGAGTCCAACAACCTATGAGGAAGTGGAGCTTCCC
- Isolate SpPa\_IAusc527.11  
TGGTCAGAGGCATCAGAAAAGTGGCAGCACCAGTGCTGTCAACGCTCTTCCCAATGGCCGCCCCACTTATAGGT  
GCGGCCGACCAGTTCATCGGTGACCTCACCAAGACCAACTCAGCCGGGGGGCGCTACCTGTCACATGCAGCTGG  
AGGCCGCTACCGTGATGTCATGGACACATGGGCTAGTGGCTCCGAGACAGGAAGCTACTCAAAGCACCTTAAGA  
CCCGGCTTGAGTCCAACAACCTATGAGGAAGTGGAGCTTCCC
- Isolate SpPa\_IAusc528.11  
TAGTCAGAGGGATCCGGAAAGTGC CGCGCCCCAGTACTGTCAACGCTGTTTCCGATGGCAGCACC ACTCATTGGG  
GTGGCAGACCAACTC ATCGGAGATCTCACCAACACCAACGCAGCAGGCCGGAAGGTACCGCTCCATGGCCGCAG  
GAGGACGCCACAAAGACGTGATGGACTCCTGGGCCAGCGGCCGACCCGACGGGAAGTTCTCCCAGGCTCTAAA  
GAACAGACTGGAGTCTGCCAACTACGAGGAAGTCGAGCTTCCT
- Isolate SpPa\_IAusc530.11  
TGGTCAGAGGCATCAGAAAAGTGGCAGCACCAGTGCTGTCAACGCTCTTCCCAATGGCCGCCCCACTTATAGGT  
GCGGCCGACCAGTTCATCGGTGACCTCACCAAGACCAACTCAGCCGGGGGGCGCTACCTGTCACATGCAGCTGG  
AGGCCGCTACCGTGATGTCATGGACACATGGGCTAGTGGCTCCGAGACAGGAAGCTACTCAAAGCACCTTAAGA  
CCCGGCTTGAGTCCAACAACCTATGAGGAAGTGGAGCTTCCC

- Isolate SpPe\_IAusc531.11

TGGTCAGAGGCATCAGAAAAGTGGCAGCACCAGTGCTGTCAACGCTCTTCCCAATGGCCGCCCACTTATAGGT  
GCGGCCGACCAGTTCATCGGTGACCTACCAAGACCAACTCAGCCGGGGGGCGCTACCTGTCACATGCAGCTGG  
AGGCCGCTACCGTGATGTCATGGACACATGGGCTAGTGGCTCCGAGACAGGAAGCTACTCAAAGCACCTTAAGA  
CCCGGCTTGAGTCCAACAACCTATGAGGAAGTGGAGCTTCCC

- Isolate SpPe\_IAusc535.11

TGGTCAGAGGCATCAGAAAAGTGGCAGCACCAGTGCTGTCAACGCTCTTCCCAATGGCCGCCCACTTATAGGT  
GCGGCCGACCAGTTCATCGGTGACCTACCAAGACCAACTCAGCCGGGGGGCGCTACCTGTCACATGCAGCTGG  
AGGCCGCTACCGTGATGTCATGGACACATGGGCTAGTGGCTCCGAGACAGGAAGCTACTCAAAGCACCTTAAGA  
CCCGGCTTGAGTCCAACAACCTATGGGGAAGTGGAGCTTCCC

- Isolate SpMs\_IAusc541.11

TGGTCAGAGGCATCAGAAAAGTGGCAGCACCAGTGCTGTCAACGCTCTTCCCAATGGCCGCCCACTTATAGGT  
GCGGCCGACCAGTTCATCGGTGACCTACCAAGACCAACTCAGCCGGGGGGCGCTACCTGTCGCATGCAGCTGG  
AGGCCGCTACCGTGATGTCATGGACACATGGGCTAGTGGCTCCGAGACAGGAAGCTACTCAAAGCACCTTAAGA  
CCCGGCTTGAGTCCAACAACCTATGAGGAAGTGGAGCTTCCC

- Isolate SpDv\_IAusc221.12

TGGTCAGAGGCATCAGAAAAGTGGCAGCACCAGTGCTGTCAACGCTCTTCCCAATGGCCGCCCACTTATAGGT  
GCGGCCGACCAGTTCATCGGTGACCTACCAAGACCAACTCAGCCGGGGGGCGCTACCTGTCACATGCAGCTGG  
AGGCCGCTACCGTGATGTCATGGACACATGGGCTAGTGGCTCCGAGACAGGAAGCTACTCAAAGCACCTTAAGA  
CCCGGCTTGAGTCCAACAACCTATGAGGAAGTGGAGCTTCCC

*VPI sequences (Segment B)*

- Isolate SpSps\_IAusc1538.10

ATCCAAACAAGACTCCAAAAACAGTAGGCTACACAAACGAGCAGCTAGCAAAACTGCTGGAGCAGACACTACC  
GATCAACACCCCAAAACATGAGGACCCCGACCTCCGGTGGGCCCCCAAGCTGGTTGATCAACTACACCGGAGACC  
TGAGCACAGACAAGTCATACCTGCCACACGTGACTATAAAGTC

- Isolate SpDv\_IAusc518.11

ATCCAAACAAGACTCCCTTGCCGTTGGTTACACCAACGAACAGATGGCAAGACTGATGGAGCAAACCTTGCT  
ATCAACCCACCAAGAACGAGGACCCAGACCTCCGCTGGGCCCAAGCTGGTTGATAAACTACACCGGAGACG  
TATCAACTGACAAGTCATACCTCCCACACGTGACCGTCAAGTC

- Isolate SpDv\_IAusc519.11

ATCCAAACAAGACTCCCTTGCCGTTGGTTACACCAACGAACAGATGGCAAGACTGATGGAGCAAACCTTGCT  
ATCAACCCACCAAGAACGAGGACCCAGACCTCCGCTGGGCCCAAGCTGGTTGATAAACTACACCGGAGACG  
TATCAACTGACAAGTCATACCTCCCACACGTGACCGTCAAGTC

- Isolate SpDv\_IAusc520.11

ATCCAAACAAGACTCCCCTGGCCGTTGGCTACACCAACGAACAGATGGCAAGACTGATGGAGCAAACCTTGCT  
ATCAACCCACCAAGAATGAGGACCCAGACCTCCGCTGGGCTCCGAGCTGGTTGATAAACTACACCGGAGACG  
TATCAACTGACAAGTCATACCTCCCACACGTGACCGTCAAGTC

- Isolate SpDb\_IAusc525.11

ATCCAAACAAGACTCCAAAAACAGTAGGCTACACAAACGAGCAGCTAGCAAAACTGCTGGAGCAGACACTACC  
GATCAACACCCCAAAACATGAGGACCCCGACCTCCGGTGGGCCCCCAAGCTGGTTGATCAACTACACCGGAGACC  
TGAGCACAGACAAGTCATACCTGCCACACGTGACTATAAAGTC

- Isolate SpPa\_IAusc526.11

ATCCAAACAAGACTCCAAAAACAGTAGGCTACACAAACGAGCAGCTAGCAAAACTGCTGGAGCAGACACTACC  
GATCAACACCCCAAAACATGAGGACCCCGACCTCCGGTGGGCCCCCAAGCTGGTTGATCAACTACACCGGAGACC  
TGAGCACAGACAAGTCATACCTGCCACACGTGACTATAAAGTC

- Isolate SpPa\_IAus527.11

ATCCAAACAAGACTCCAAAAACAGTGGGCTACACGAACGAACAGCTAGCAAAACTGCTGGAGCAAACACTACC  
GATCAACACACCAAAGCATGAGGACCCCGACCTCCGGTGGGCCCAAGCTGGCTGATCAACTACACCGGAGAC  
CTGAGCACAGACAAGTCATATCTGCCACATGTGACCATAAAGTC

- Isolate SpPa\_IAus528.11

ATCCAAACAAGACTCCCTTGGCCGTTGGTTACACCAACGAACAGATGGCAAGACTGATGGAGCAAACCTTGCCCT  
ATCAACCCACCAAAGAACGAGGACCCAGACCTCCGCTGGGCCCAAGCTGGTTGATAAACTACACCGGAGACG  
TATCAACTGACAAGTCATACCTCCACACGTGACCGTCAAGTC

- Isolate SpPa\_IAus530.11

ATCCAAACAAGACTCCAAAAACAGTAGGCTACACAAACGAGCAGCTAGCAAAACTGCTGGAGCAGACACTACC  
GATCAACACCCCAAAACATGAGGACCCCGACCTCCGGTGGGCCCCAGCTGGTTGATCAACTACACCGGAGACC  
TGAGCACAGACAAGTCATACCTGCCACACGTGACTATAAAGTC

- Isolate SpPe\_IAus531.11

ATCCAAACAAGACTCCAAAAACAGTAGGCTACACAAACGAGCAGCTAGCAAAACTGCTGGAGCAGACACTACC  
GATCAACACCCCAAAACATGAGGACCCCGACCTCCGGTGGGCCCCAGCTGGTTGATCAACTACACCGGAGACC  
TGAGCACAGACAAGTCATACCTGCCACACGTGACTATAAAGTC

- Isolate SpPe\_IAus535.11

ATCCAAACAAGACTCCAAAAACAGTAGGCTACACAAACGAGCAGCTAGCAAAACTGCTGGAGCAGACACTACC  
GATCAACACCCCAAAACATGAGGACCCCGACCTCCGGTGGGCCCCAGCTGGTTGATCAACTACACCGGAGACC  
TGAGCACAGACAAGTCATACCTGCCACACGTGACTATAAAGTC

- Isolate SpMs\_IAus541.11

ATCCAAACAAGACTCCAAAAACAGTAGGCTACACAAACGAGCAGCTAGCAAAACTGCTGGAGCAGACACTACC  
GATCAACACCCCAAAACATGAGGACCCCGACCTCCGGTGGGCCCCAGCTGGTTGATCAACTACACCGGAGACC  
TGAGCACAGACAAGTCATACCTGCCACACGTGACTATAAAGTC

- Isolate SpDv\_IAus221.12

ATCCAAACAAGACTCCAAAAACAGTAGGCTACACAAACGAGCAGCTAGCAAAACTGCTGGAGCAGACACTACC  
GATCAACACCCCAAAACATGAGGACCCCGACCTCCGGTGGGCCCCAGCTGGTTGATCAACTACACCGGAGACC  
TGAGCACAGACAAGTCATACCTGCCACACGTGACTATAAAGTC
